# Supplementary material for: Sustained Release of Minor-Groove-Binding Antibiotic Netropsin from Calcium-Coated Groove-Rich DNA Particles
Source: MDPI journal article supplement (doi:10.3390/pharmaceutics11080387), 2019-08-02
Supplement: s1 [file s1]

Article

# Sustained Release of Minor-Groove-Binding Antibiotic Netropsin from Calcium-Coated Groove-Rich DNA Particles

Hyunsu Jeon<sup>†</sup>, Hyangsu Nam<sup>†</sup> and Jong Bum Lee<sup>\*†</sup>

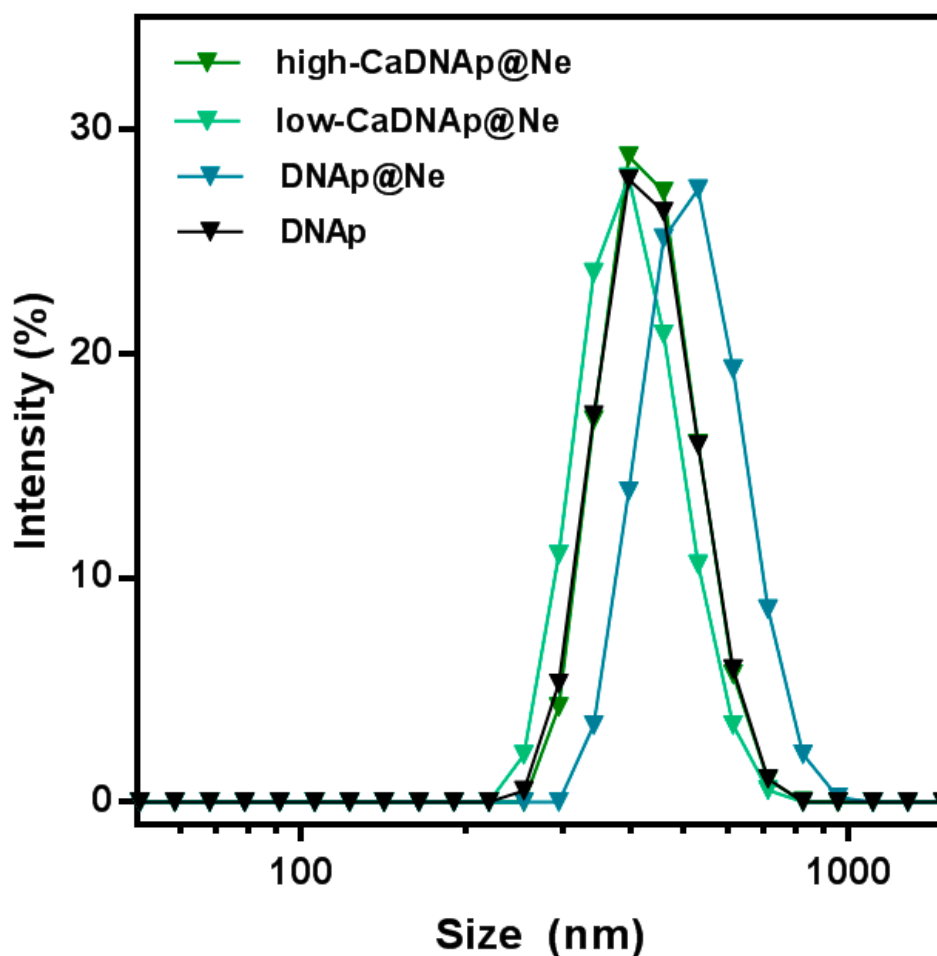

Figure S1. Size distribution of the DNAP-based netropsin release systems. (DNAP: black, DNAP@Ne: blue, low-CaDNAP@Ne: light green, high-CaDNAP@Ne: green).

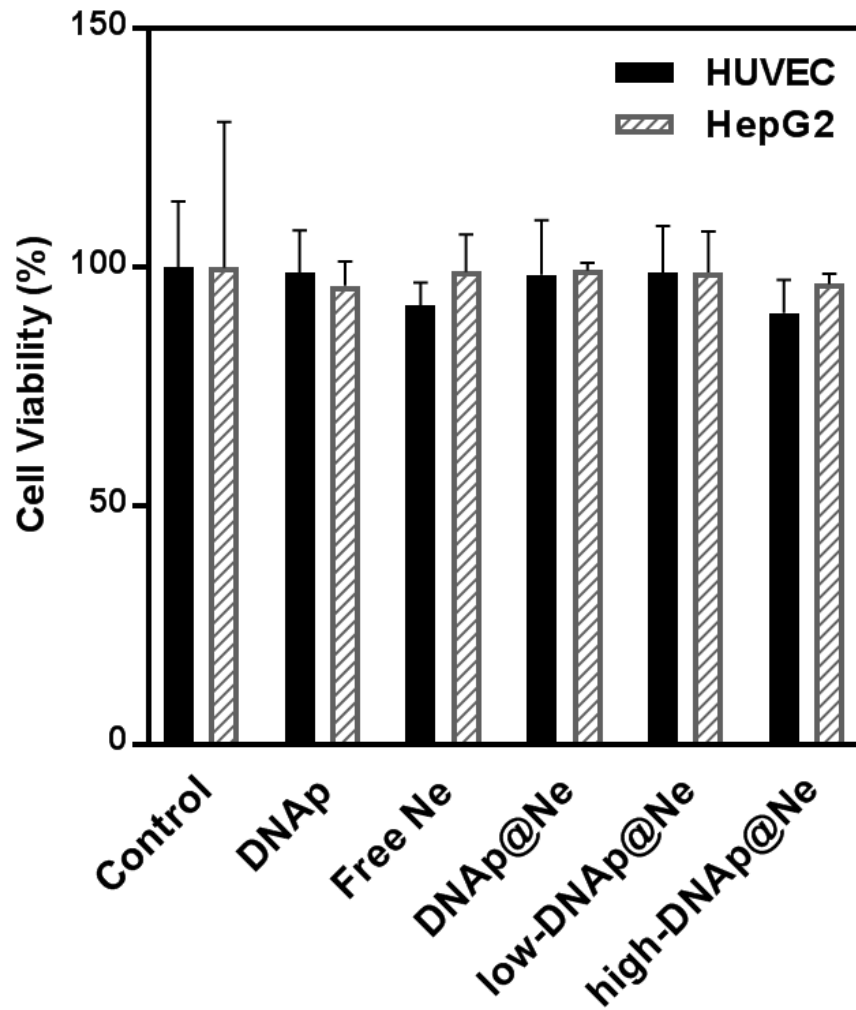

**Figure S2. Cell viability when exposed to DNAP-based netropsin release systems.** The viability of the CaDNAP@Ne and control groups was tested using the normal endothelial cell line HUVEC and the cancer cell line HepG2.

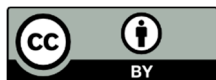

© 2019 by the authors. Submitted for possible open access publication under the terms and conditions of the Creative Commons Attribution (CC BY) license (<http://creativecommons.org/licenses/by/4.0/>).
